# Supplementary material for: Genome-Wide Identification of DUF668 Gene Family and Expression Analysis under Drought and Salt Stresses in Sweet Potato [Ipomoea batatas (L.) Lam]
Source: Genes (Basel). 2023 Jan 14;14(1):217. doi: 10.3390/genes14010217 (PMC9858669; doi:10.3390/genes14010217)
Supplement: Supplementary file 1 [file genes-14-00217-s001.zip › Table S1.xls]

## Sheet: Sheet1
Table S1. All primers used in this study.
Gene	F-primer	R-primer
IbDUF668-2	CAGCATAAGAACGGCCCTCA	AGCCACTCTAGGATTCCCGT
IbDUF668-3	TGCACCTCTCGCACAAGAAT	CAGTTCACAGACGACTGCCT
IbDUF668-6	GCATAAGAACGGCCCTCAGA	ATTCCCGTCAATGCCTCGTT
IbDUF668-7	TGCACCTCTCGCACAAGAAT	CAGTTCACAGACGACTGCCT
IbDUF668-9	CTCGAGTGGCTTGTTCCAGT	AGCTCGTTTCCGTTGTTTGC
IbDUF668-10	GCAGACGCTTTACCATGCAG	TTGGGCGTTTCAATGTGCAG
IbDUF668-11	CCTCCACTCCTGCAAGGTTT	AGGCCAACTATGCTCGCTTT
IbDUF668-12	TTCTCCGAGCAGGCAAGAAG	AGCAGTGGCTTCAAACCGTA
IbDUF668-13	CATTTGGGAACGGGTCACCT	TTCCTTTCTCGCCCGTTTCA
IbDUF668-14	GGAAACACCAGTTCACCCCT	CTCTTTCTTTGCCTTGCCCG
