# Supplementary figures and images for: Genome-Wide Identification of DUF668 Gene Family and Expression Analysis under Drought and Salt Stresses in Sweet Potato [Ipomoea batatas (L.) Lam]
Source: MDPI journal article supplement (doi:10.3390/genes14010217), 2023-01-14

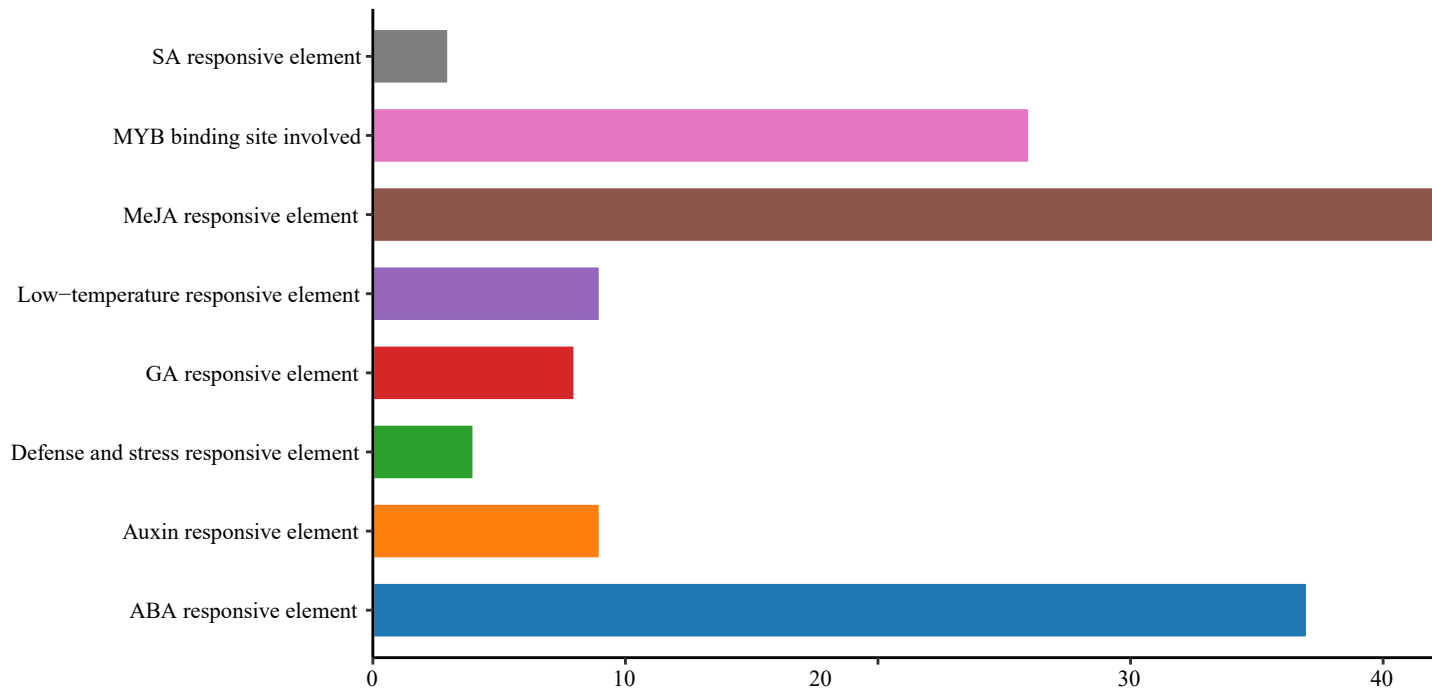

Figure S2: Number of *cis*-acting element

Supplement: s1 [file s1]

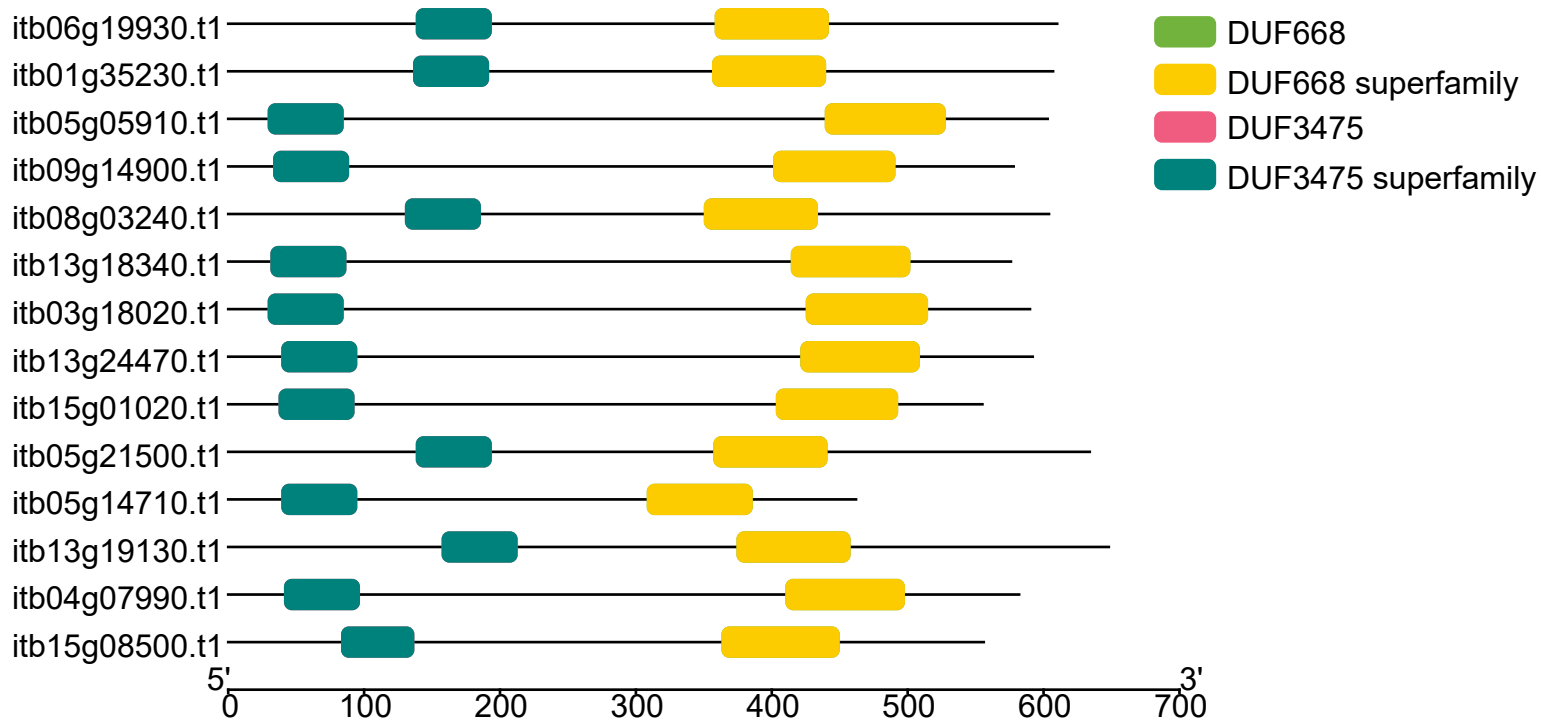

Figure S1: Distribution of the DUF668 domain in the DUF668 proteins of *Ipomoea batatas*

Supplement: s1 [file s1]
